# Supplementary material for: Evolution of silicate coordination in architected amorphous and crystalline magnesium silicates during carbon mineralization
Source: Royal Society of Chemistry journal article supplement (doi:10.1039/d4cp04762a), 2025-01-01
Supplement: d4cp04762a1.pdf [file d4cp04762a1.pdf]

## Supplementary Information

# Evolution of Silicate Coordination in Architected Amorphous and Crystalline Magnesium Silicates during Carbon Mineralization

Xun Gao,<sup>1</sup> Prince Ochonma,<sup>2</sup> Divya Prasad,<sup>1</sup> Mahadik Mahadeo,<sup>1</sup> Ivan Kuzmenko,<sup>3</sup>

Jan Ilavsky,<sup>3</sup> and Greeshma Gadikota<sup>1,2\*</sup>

<sup>1</sup>School of Civil and Environmental Engineering, Cornell University, Ithaca, NY

14853

<sup>2</sup>Smith School of Chemical and Biological Engineering, Cornell University, Ithaca,

NY 14853

<sup>3</sup>Advanced Photon Source, Argonne National Laboratory, Lemont, Illinois 60439

\* Corresponding Author. Phone: +1 607-255-4796. E-mail: [gg464@cornell.edu](mailto:gg464@cornell.edu)

**Table S1.** Mean particle sizes of the unreacted and carbonate-bearing silicate sorbents.

| <b>Mg-silicates</b> | <b>Unreacted</b> | <b>H<sub>2</sub>O, Stirring</b> | <b>NaHCO<sub>3</sub>, Stirring</b> | <b>H<sub>2</sub>O, No-stirring</b> | <b>NaHCO<sub>3</sub>, No-stirring</b> |
|---------------------|------------------|---------------------------------|------------------------------------|------------------------------------|---------------------------------------|
| <b>AC</b>           | 13.05 μm         | 99.15 μm                        | 31.95 μm                           | 14.03 μm                           | 9.61 μm                               |
| <b>HC</b>           | 25.04 μm         | 15.78 μm                        | 8.01 μm                            | 14.32 μm                           | 7.99 μm                               |

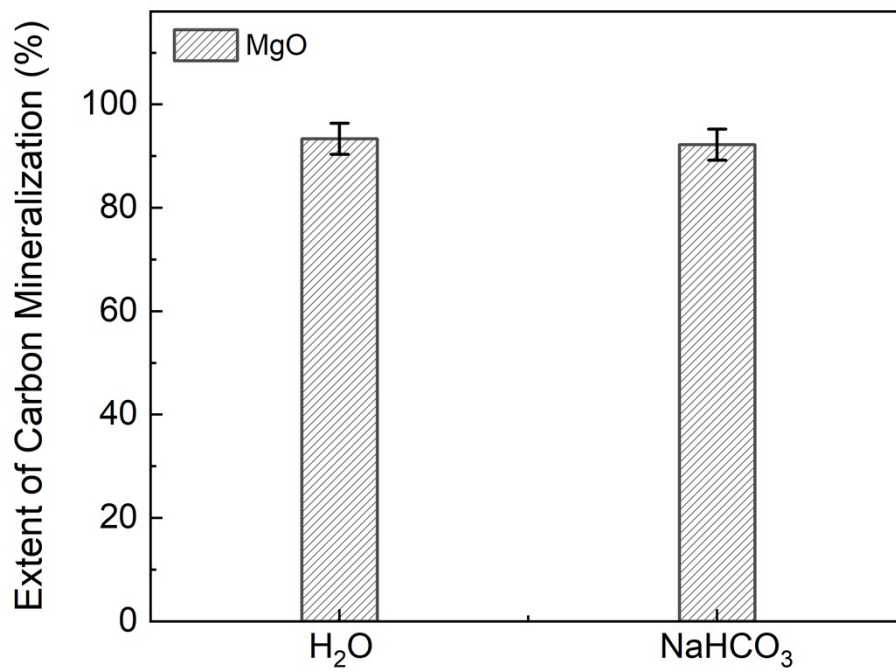

**Figure S1.** The carbon mineralization extent of MgO without stirring at 200 °C, 20 atm.

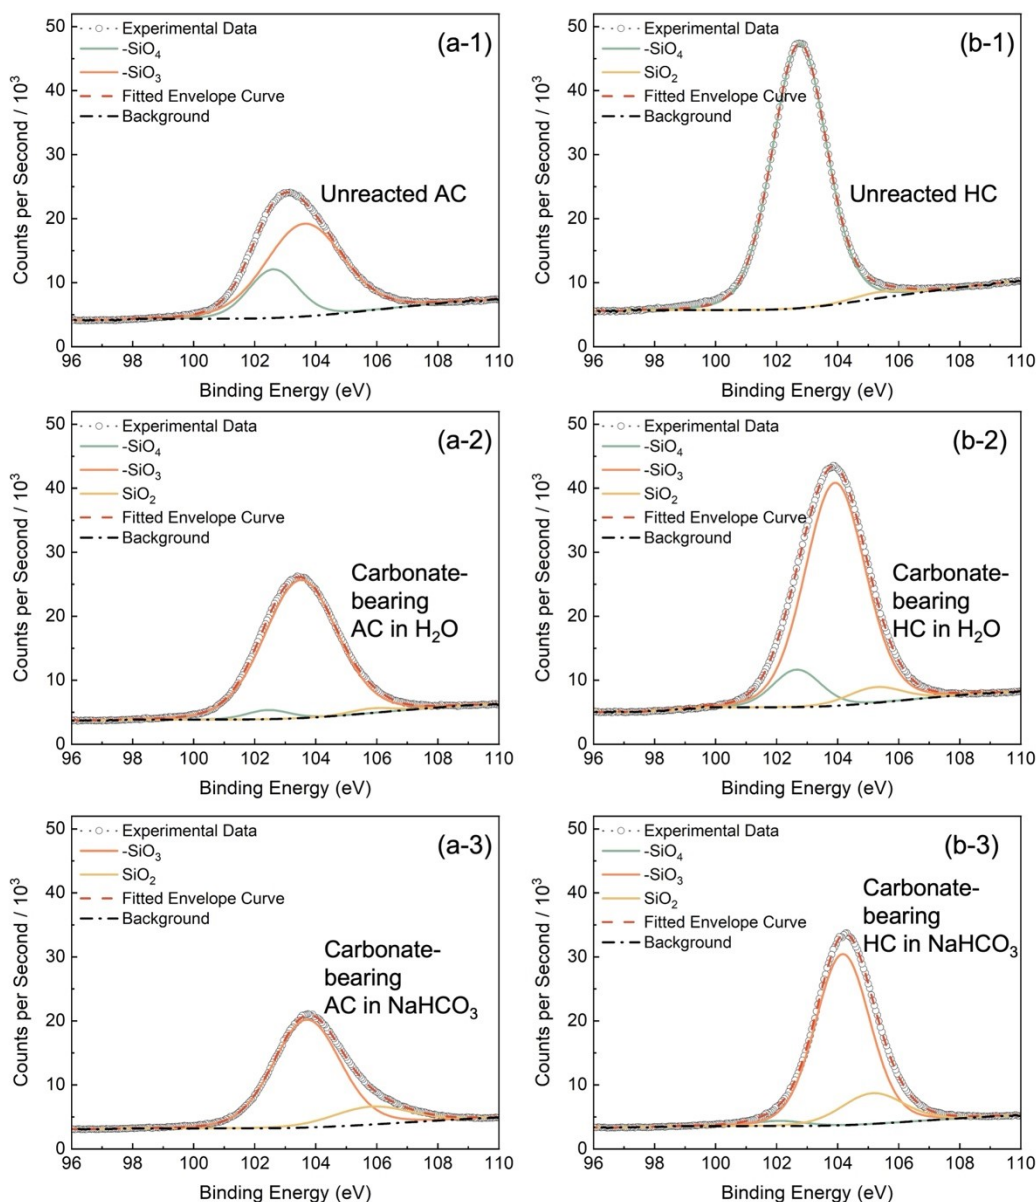

**Figure S2.** The deconvoluted Si2p spectrum of the (a-1) AC Mg-silicate, (a-2) carbonate-bearing AC Mg-silicate with DI-water, (a-3) carbonate-bearing AC Mg-silicate with NaHCO<sub>3</sub> and (b-1) HC Mg-silicate, (b-2) carbonate-bearing HC Mg-silicate with DI-water, (b-3) carbonate-bearing HC Mg-silicate with NaHCO<sub>3</sub>, in stirring mode at 200 °C, 20 atm determined by X-ray photoelectron spectroscopy.

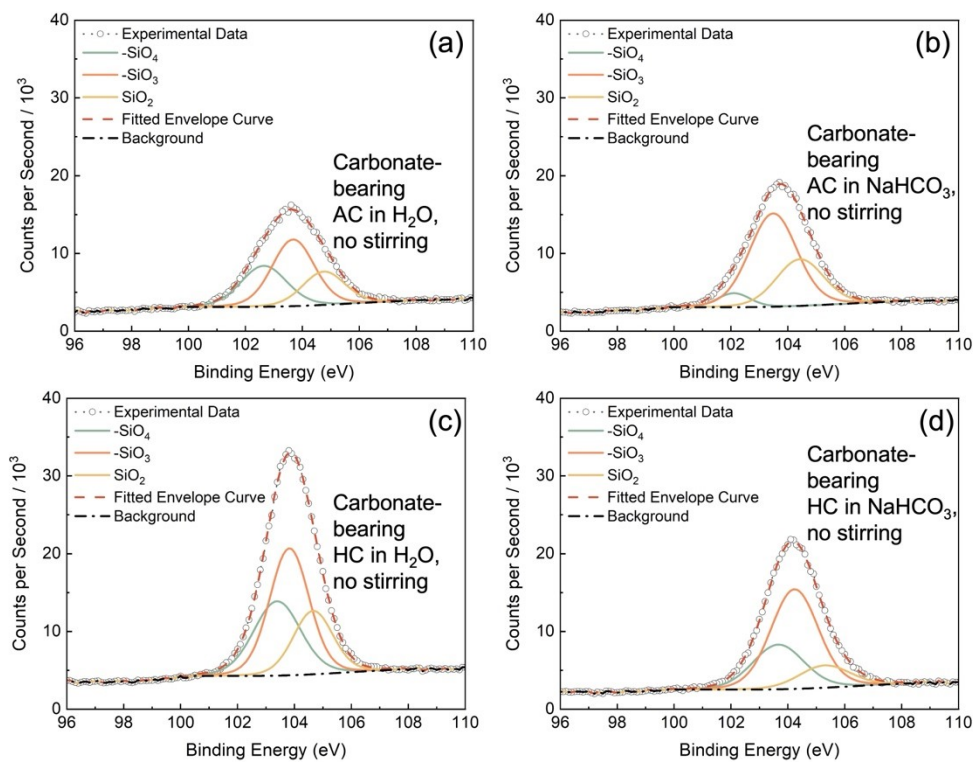

**Figure S3.** The deconvoluted Si<sub>2p</sub> spectrum of the (a) carbonate-bearing AC Mg-silicate with DI-water, (b) carbonate-bearing AC Mg-silicate with NaHCO<sub>3</sub>, (c) carbonate-bearing HC Mg-silicate with DI-water, and (d) carbonate-bearing HC Mg-silicate with NaHCO<sub>3</sub>, in no-stirring mode at 200 °C, 20 atm determined by X-ray photoelectron spectroscopy.

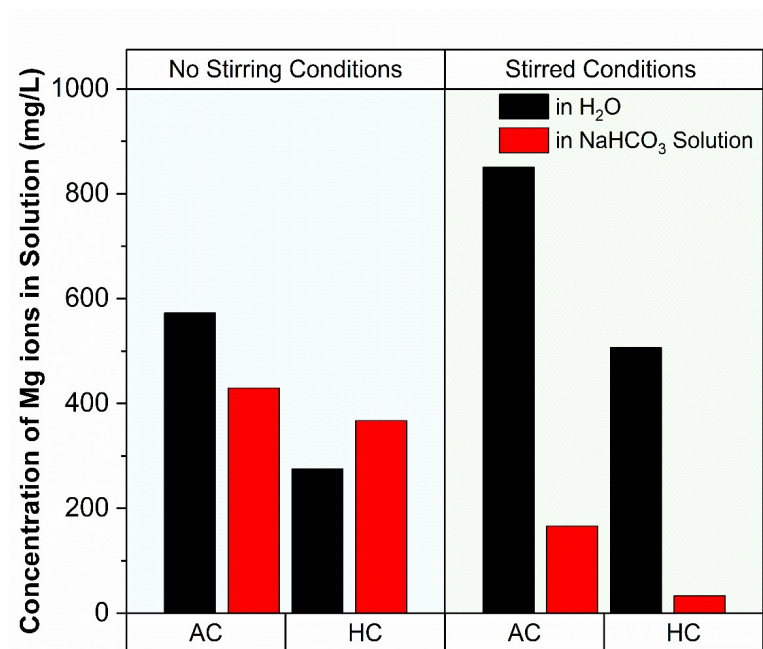

**Figure S4.** The concentration of Mg ions in the collected aqueous samples determined by Inductively Coupled Plasma (ICP) analysis.

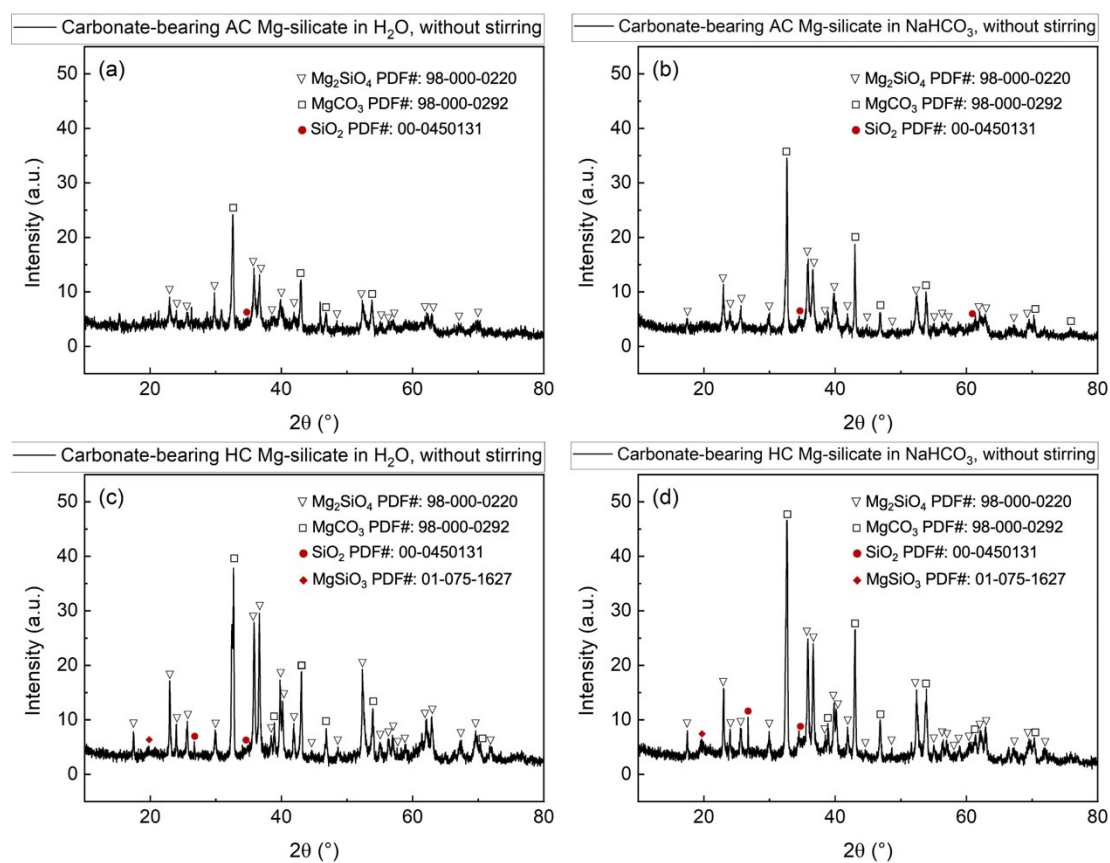

**Figure S5.** Structural arrangement of (a) carbonate-bearing AC Mg-silicate with DI-water, (b) carbonate-bearing AC Mg-silicate with  $NaHCO_3$ , (c) carbonate-bearing HC Mg-silicate with DI-water, and (d) carbonate-bearing HC Mg-silicate with  $NaHCO_3$  in no-stirring mode at  $200\text{ }^{\circ}C$ ,  $20\text{ atm}$  determined by X-ray diffraction measurements.

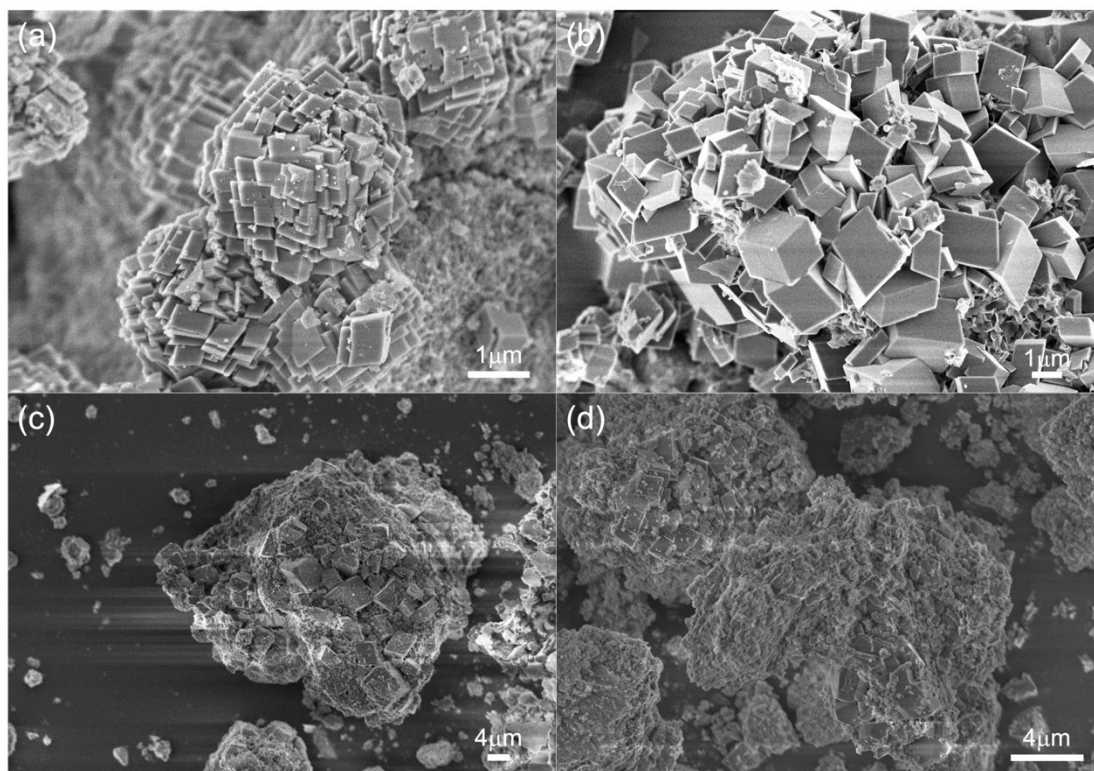

**Figure S6.** Morphologies determined using Scanning Electron Microscopy (SEM) of: (a) carbonate-bearing AC Mg-silicate with DI-water, (b) carbonate-bearing AC Mg-silicate with  $\text{NaHCO}_3$ , (c) carbonate-bearing HC Mg-silicate with DI-water, and (d) carbonate-bearing HC Mg-silicate with  $\text{NaHCO}_3$  in no-stirring mode. Experiments are conducted at 200 °C,  $p\text{CO}_2$  of 20 atm for a reaction time of 3 hours.
